# Supplementary material for: Winning the arms race: host–parasite shared evolutionary history reduces infection risks in fish final hosts
Source: Biol Lett. 2018 Jul 25;14(7):20180363. doi: 10.1098/rsbl.2018.0363 (PMC6083226; doi:10.1098/rsbl.2018.0363)
Supplement: Sheath_et_al_data [file rsbl20180363supp1.xlsx]

## Sheet: CFR data Experienced hosts
Fish species	Prey item	Initial prey number	Prey eaten	Remaining prey
S. cephalus	Infected amphipod	64	6	58
S. cephalus	Infected amphipod	64	6	58
S. cephalus	Infected amphipod	64	2	62
S. cephalus	Infected amphipod	32	3	29
S. cephalus	Infected amphipod	32	10	22
S. cephalus	Infected amphipod	32	4	28
S. cephalus	Infected amphipod	16	2	14
S. cephalus	Infected amphipod	16	3	13
S. cephalus	Infected amphipod	16	8	8
S. cephalus	Infected amphipod	12	9	3
S. cephalus	Infected amphipod	12	7	5
S. cephalus	Infected amphipod	12	5	7
S. cephalus	Infected amphipod	8	0	8
S. cephalus	Infected amphipod	8	4	4
S. cephalus	Infected amphipod	8	1	7
S. cephalus	Infected amphipod	4	3	1
S. cephalus	Infected amphipod	4	2	2
S. cephalus	Infected amphipod	4	0	4
S. cephalus	Uninfected amphipod	64	20	44
S. cephalus	Uninfected amphipod	64	27	37
S. cephalus	Uninfected amphipod	64	25	39
S. cephalus	Uninfected amphipod	32	24	8
S. cephalus	Uninfected amphipod	32	21	11
S. cephalus	Uninfected amphipod	32	25	7
S. cephalus	Uninfected amphipod	16	15	1
S. cephalus	Uninfected amphipod	16	15	1
S. cephalus	Uninfected amphipod	16	15	1
S. cephalus	Uninfected amphipod	12	11	1
S. cephalus	Uninfected amphipod	12	12	0
S. cephalus	Uninfected amphipod	12	7	5
S. cephalus	Uninfected amphipod	8	8	0
S. cephalus	Uninfected amphipod	8	8	0
S. cephalus	Uninfected amphipod	8	8	0
S. cephalus	Uninfected amphipod	4	4	0
S. cephalus	Uninfected amphipod	4	3	1
S. cephalus	Uninfected amphipod	4	4	0
B. barbus	Infected amphipod	64	2	62
B. barbus	Infected amphipod	64	3	61
B. barbus	Infected amphipod	64	3	61
B. barbus	Infected amphipod	32	3	29
B. barbus	Infected amphipod	32	5	27
B. barbus	Infected amphipod	32	2	30
B. barbus	Infected amphipod	16	2	14
B. barbus	Infected amphipod	16	1	15
B. barbus	Infected amphipod	16	2	14
B. barbus	Infected amphipod	12	2	10
B. barbus	Infected amphipod	12	3	9
B. barbus	Infected amphipod	12	3	9
B. barbus	Infected amphipod	8	1	7
B. barbus	Infected amphipod	8	2	6
B. barbus	Infected amphipod	8	2	6
B. barbus	Infected amphipod	4	1	3
B. barbus	Infected amphipod	4	1	3
B. barbus	Infected amphipod	4	2	2
B. barbus	Uninfected amphipod	64	17	47
B. barbus	Uninfected amphipod	64	11	53
B. barbus	Uninfected amphipod	64	13	51
B. barbus	Uninfected amphipod	32	11	21
B. barbus	Uninfected amphipod	32	17	15
B. barbus	Uninfected amphipod	32	12	20
B. barbus	Uninfected amphipod	16	6	10
B. barbus	Uninfected amphipod	16	15	1
B. barbus	Uninfected amphipod	16	9	7
B. barbus	Uninfected amphipod	12	4	8
B. barbus	Uninfected amphipod	12	8	4
B. barbus	Uninfected amphipod	12	5	7
B. barbus	Uninfected amphipod	8	5	3
B. barbus	Uninfected amphipod	8	6	2
B. barbus	Uninfected amphipod	8	6	2
B. barbus	Uninfected amphipod	4	3	1
B. barbus	Uninfected amphipod	4	4	0
B. barbus	Uninfected amphipod	4	3	1

## Sheet: CFR data Naive hosts
Fish species	Prey item	Initial prey number	Prey eaten	Remaining prey
C. auratus	Infected amphipod	64	30	34
C. auratus	Infected amphipod	64	35	29
C. auratus	Infected amphipod	64	28	36
C. auratus	Infected amphipod	32	21	11
C. auratus	Infected amphipod	32	26	6
C. auratus	Infected amphipod	32	22	10
C. auratus	Infected amphipod	16	16	0
C. auratus	Infected amphipod	16	13	3
C. auratus	Infected amphipod	16	14	2
C. auratus	Infected amphipod	12	10	2
C. auratus	Infected amphipod	12	12	0
C. auratus	Infected amphipod	12	11	1
C. auratus	Infected amphipod	8	7	1
C. auratus	Infected amphipod	8	8	0
C. auratus	Infected amphipod	8	7	1
C. auratus	Infected amphipod	4	4	0
C. auratus	Infected amphipod	4	4	0
C. auratus	Infected amphipod	4	4	0
C. auratus	Uninfected amphipod	64	41	23
C. auratus	Uninfected amphipod	64	40	24
C. auratus	Uninfected amphipod	64	36	28
C. auratus	Uninfected amphipod	32	23	9
C. auratus	Uninfected amphipod	32	27	5
C. auratus	Uninfected amphipod	32	24	8
C. auratus	Uninfected amphipod	16	16	0
C. auratus	Uninfected amphipod	16	14	2
C. auratus	Uninfected amphipod	16	16	0
C. auratus	Uninfected amphipod	12	12	0
C. auratus	Uninfected amphipod	12	12	0
C. auratus	Uninfected amphipod	12	11	1
C. auratus	Uninfected amphipod	8	8	0
C. auratus	Uninfected amphipod	8	7	1
C. auratus	Uninfected amphipod	8	8	0
C. auratus	Uninfected amphipod	4	4	0
C. auratus	Uninfected amphipod	4	4	0
C. auratus	Uninfected amphipod	4	4	0
C. carpio	Uninfected amphipod	64	14	50
C. carpio	Uninfected amphipod	64	17	47
C. carpio	Uninfected amphipod	64	13	51
C. carpio	Uninfected amphipod	32	16	16
C. carpio	Uninfected amphipod	32	12	20
C. carpio	Uninfected amphipod	32	15	17
C. carpio	Uninfected amphipod	16	14	2
C. carpio	Uninfected amphipod	16	12	4
C. carpio	Uninfected amphipod	16	14	2
C. carpio	Uninfected amphipod	8	7	1
C. carpio	Uninfected amphipod	8	6	2
C. carpio	Uninfected amphipod	8	8	0
C. carpio	Uninfected amphipod	4	3	1
C. carpio	Uninfected amphipod	4	4	0
C. carpio	Uninfected amphipod	4	4	0
C. carpio	Infected amphipod	64	18	46
C. carpio	Infected amphipod	64	16	48
C. carpio	Infected amphipod	64	19	45
C. carpio	Infected amphipod	32	15	17
C. carpio	Infected amphipod	32	18	14
C. carpio	Infected amphipod	32	14	18
C. carpio	Infected amphipod	16	15	1
C. carpio	Infected amphipod	16	11	5
C. carpio	Infected amphipod	16	14	2
C. carpio	Infected amphipod	8	6	2
C. carpio	Infected amphipod	8	5	3
C. carpio	Infected amphipod	8	8	0
C. carpio	Infected amphipod	4	4	0
C. carpio	Infected amphipod	4	4	0
C. carpio	Infected amphipod	4	4	0
